# Supplementary material for: Association between age at onset of independent walking and objectively measured sedentary behavior is mediated by moderate-to-vigorous physical activity in primary school children
Source: PubMed Central journal article supplement (PMC6143251; doi:10.1371/journal.pone.0204030), 2018-09-18
Supplement: pone.0204030.s002.pdf [file pone.0204030.s002.pdf]

**S2 Table**

| Independent variables             | SB (min/day) |         |              | LPA (min/day) |         |              | MVPA (min/day) |         |              |
|-----------------------------------|--------------|---------|--------------|---------------|---------|--------------|----------------|---------|--------------|
|                                   | <i>B</i>     | $\beta$ | <i>P</i>     | <i>B</i>      | $\beta$ | <i>P</i>     | <i>B</i>       | $\beta$ | <i>P</i>     |
| <b>Boys</b>                       |              |         |              |               |         |              |                |         |              |
| <b>Model 1</b>                    |              |         |              |               |         |              |                |         |              |
| Age at independent walking (mos.) | 8.87         | 0.12    | 0.087        | -4.07         | -0.07   | 0.335        | -4.80          | -0.19   | <b>0.007</b> |
| <b>Model 2</b>                    |              |         |              |               |         |              |                |         |              |
| Age at independent walking (mos.) | 10.79        | 0.14    | <b>0.035</b> | -5.40         | -0.09   | 0.199        | -5.40          | -0.21   | <b>0.002</b> |
| <b>Girls</b>                      |              |         |              |               |         |              |                |         |              |
| <b>Model 1</b>                    |              |         |              |               |         |              |                |         |              |
| Age at independent walking (mos.) | 12.54        | 0.15    | <b>0.005</b> | -8.25         | -0.12   | <b>0.029</b> | -4.29          | -0.18   | <b>0.004</b> |
| <b>Model 2</b>                    |              |         |              |               |         |              |                |         |              |
| Age at independent walking (mos.) | 13.05        | 0.16    | <b>0.004</b> | -8.55         | -0.13   | <b>0.024</b> | -4.51          | -0.19   | <b>0.002</b> |
