# Supplementary material for: Association between age at onset of independent walking and objectively measured sedentary behavior is mediated by moderate-to-vigorous physical activity in primary school children
Source: PubMed Central journal article supplement (PMC6143251; doi:10.1371/journal.pone.0204030), 2018-09-18
Supplement: pone.0204030.s003.pdf [file pone.0204030.s003.pdf]

**S3 Table**

| Independent variables             | SB (min/day) |         |                  |
|-----------------------------------|--------------|---------|------------------|
|                                   | <i>B</i>     | $\beta$ | <i>P</i>         |
| <b>Boys</b>                       |              |         |                  |
| Age at independent walking (mos.) | 0.80         | 0.01    | 0.844            |
| MVPA (min/day)                    | -1.85        | -0.63   | <b>&lt;0.001</b> |
| <b>Girls</b>                      |              |         |                  |
| Age at independent walking (mos.) | 5.01         | 0.06    | 0.176            |
| MVPA (min/day)                    | -1.79        | -0.51   | <b>&lt;0.001</b> |
