# Supplementary material for: Association between age at onset of independent walking and objectively measured sedentary behavior is mediated by moderate-to-vigorous physical activity in primary school children
Source: PLoS One. 2018 Sep 18;13(9):e0204030. doi: 10.1371/journal.pone.0204030 (PMC6143251; doi:10.1371/journal.pone.0204030)
Supplement: S1 Table — * P < 0.05; ** P < 0.01; *** P < 0.001. SB, sedentary behavior; LPA, light physical activity; MVPA, moderate-to-vigorous physical activity. (PDF) [file pone.0204030.s001.pdf]

**S1 Table**

| Variables                         | Age at independent walking (mos.) | Height (cm)    | Weight (kg)     | SB (min/day)  | LPA (min/day)    | MVPA (min/day)   |
|-----------------------------------|-----------------------------------|----------------|-----------------|---------------|------------------|------------------|
| <b>Boys</b>                       |                                   |                |                 |               |                  |                  |
| Birth weight (g)                  | -0.079                            | 0.117          | 0.129           | -0.051        | 0.025            | 0.139            |
| Age at independent walking (mos.) |                                   | -0.047         | -0.125          | <b>0.161*</b> | -0.062           | <b>-0.230**</b>  |
| Height (cm)                       |                                   |                | <b>0.711***</b> | <b>0.161*</b> | <b>-0.218**</b>  | -0.012           |
| Weight (kg)                       |                                   |                |                 | <b>0.164*</b> | <b>-0.181*</b>   | -0.048           |
| SB (min/day)                      |                                   |                |                 |               | <b>-0.725***</b> | <b>-0.570***</b> |
| LPA (min/day)                     |                                   |                |                 |               |                  | <b>0.378***</b>  |
| <b>Girls</b>                      |                                   |                |                 |               |                  |                  |
| Birth weight (g)                  | -0.131                            | <b>0.184**</b> | 0.124           | -0.020        | -0.008           | -0.035           |
| Age at independent walking (mos.) |                                   | -0.094         | -0.096          | <b>0.152*</b> | -0.099           | <b>-0.174*</b>   |
| Height (cm)                       |                                   |                | <b>0.753***</b> | 0.059         | -0.008           | -0.085           |
| Weight (kg)                       |                                   |                |                 | <b>0.154*</b> | -0.118           | -0.104           |
| SB (min/day)                      |                                   |                |                 |               | <b>-0.726***</b> | <b>-0.583***</b> |
| LPA (min/day)                     |                                   |                |                 |               |                  | <b>0.320***</b>  |
